# Supplementary material for: Structure of homodimeric RC with cytochromes c bound from Acidobacteria
Source: Research Square preprint supplement (doi:10.21203/rs.3.rs-1484102/v1), 2022-03-30
Supplement: Supplementary file 1 [file 22a46858b46043b4f7ec929c.docx]

**Supplementary Materials for**

**Structure of homodimeric RC with cytochromes *c* bound from *Acidobacteria***

**Authors:** Shishang Dong1,4, Guoqiang Huang2,4, Changhui Wang1,4, Jiajia Wang1, Sen-Fang Sui2,3*, Xiaochun Qin1*

**Affiliations:**

1School of Biological Science and Technology, University of Jinan, Jinan, China.

2State Key Laboratory of Membrane Biology, Beijing Advanced Innovation Center for Structural Biology, School of Life Sciences, Tsinghua University, Beijing, China.

3Department of Biology, Southern University of Science and Technology, Shenzhen, China.

4These authors contributed equally to this work: Shishang Dong, Guoqiang Huang, Changhui Wang

*Corresponding author Email: suisf@mail.tsinghua.edu.cn (Sen-Fang Sui); bio_qinxc@ujn.edu.cn (Xiaochun Qin)

**
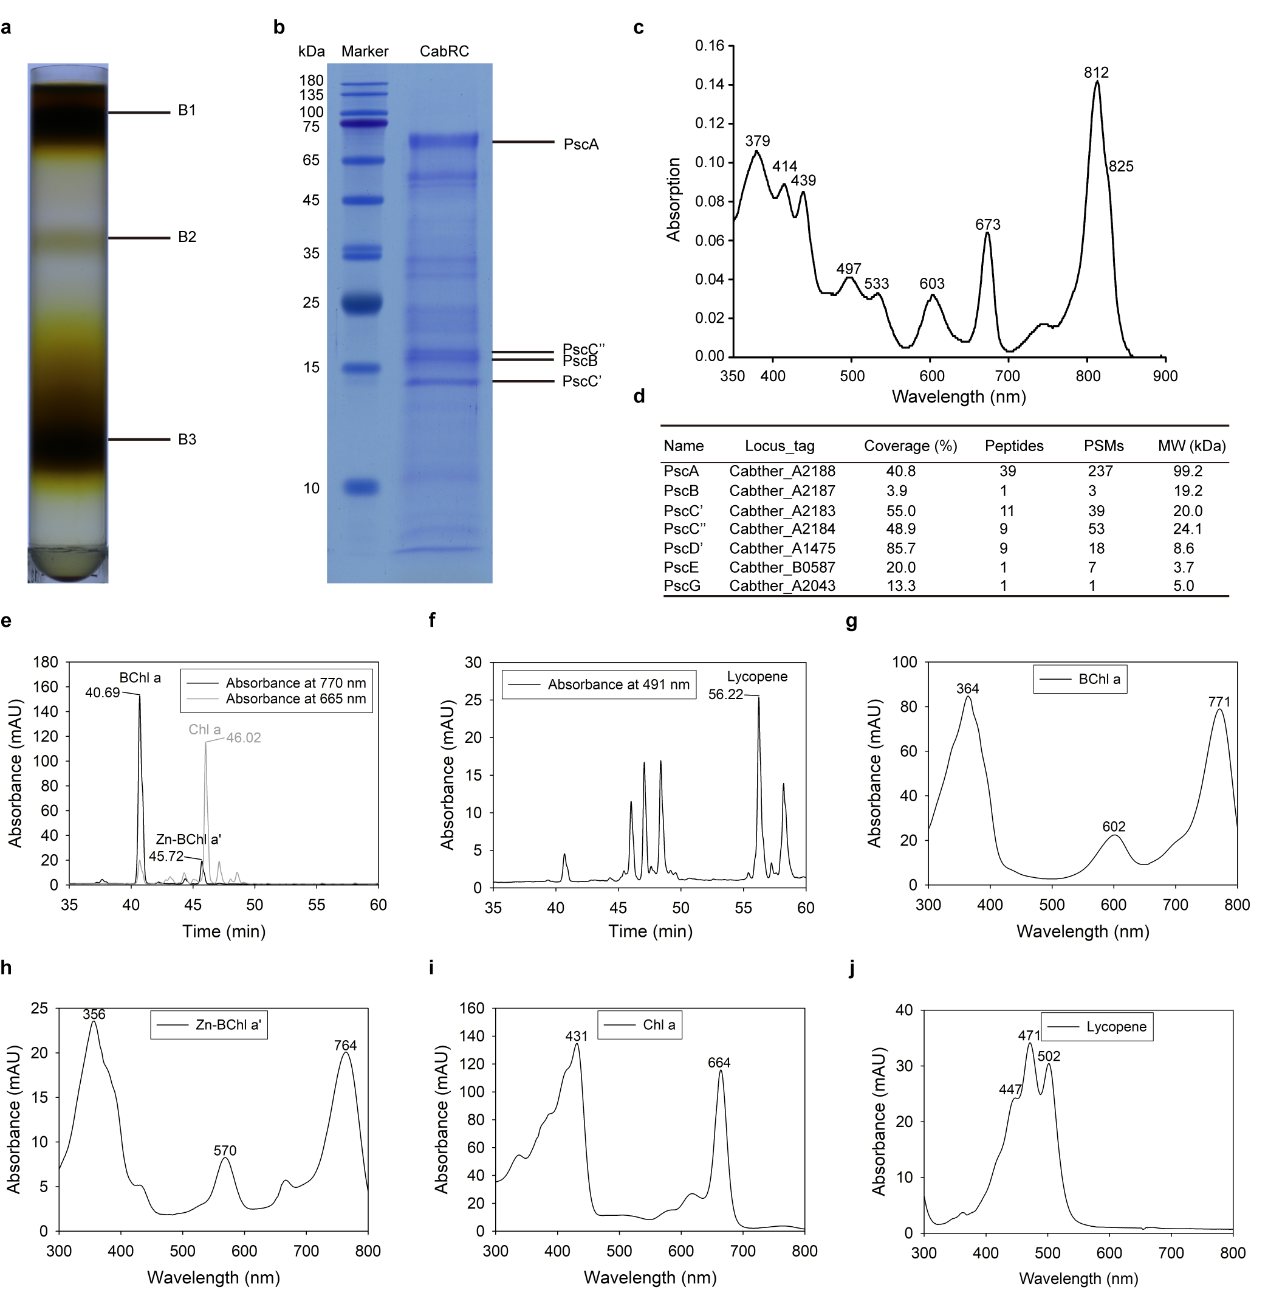
**

**Extended Data Fig.1 | Purification and charicterization of CabRC complex. a**, Sucrose density gradient (0.3 M-0.9 M) used to prepare a crude CabRC fraction. Band B2 mainly contains crude CabRC samples. **b**, SDS-PAGE analysis of the purified CabRC complex. **c**,Absorption spectra of the purified CabRC complex at room temperature. **d**, Mass spectrometric analysis of the CabRC. **e** to **j**, HPLCanalysis of pigment content in CabRC samples. **e**, HPLC chromatogram of CabRC samples showing elution peaks of BChl *a* and Zn-BChl *a*’ (detected at 770 nm) and Chl *a* (detected at 665 nm). **f**, HPLC chromatogram of CabRC samples showing an elution peak of lycopene (detected at 491 nm). The pigment peaks were identified based on the characteristic absorption spectrum and elute time of each fraction. **g** to **j**, Absorption spectra of BChl *a*, Zn-BChl *a*’, Chl *a* and lycopene in the HPLC eluate shown in (**e**) and (**f**). Data shown in this figure is repeated more than three times, and all resulted in the same results.

**
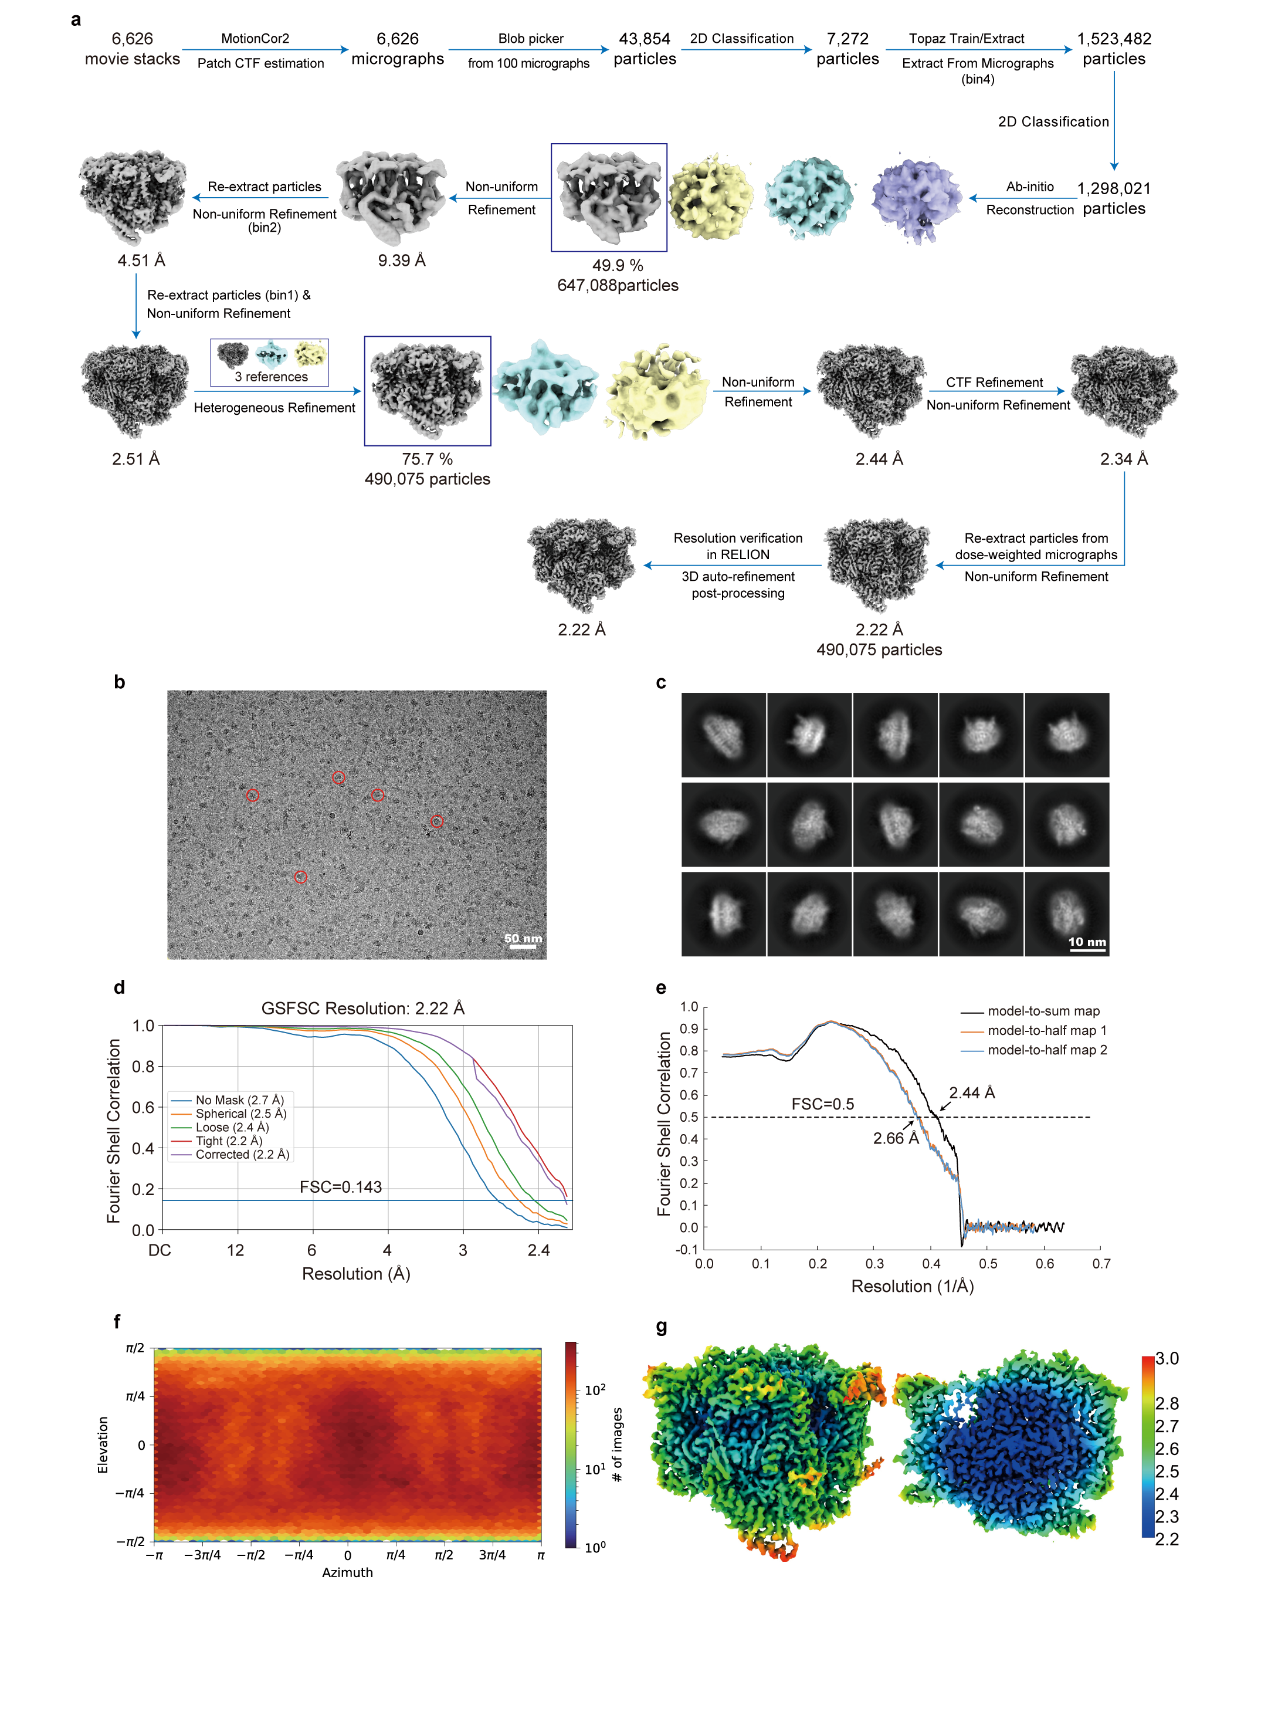
**

**Extended Data Fig.2 | Cryo-EM data and map quality of the CabRCS complex. a**, Flowchart of the cryo-EM data processing for the CabRCS complex. **b,** A representative cryo-EM micrograph of the CabRCS complex with typical particles marked by red cycles. **c,** Representative 2D-averaged classes of the CabRCS complex. **d,** Gold-standard Fourier shell correlation (FSC=0.143) curves of the CabRCS complex. The unmasked, spherical, loose, tight, corrected curves are shown with different colors. **e,** Model versus map FSC curves for the CabRCS complex. FSC curves of the finally refined model of the CabRCS complex versus the sum map (black), half map1 (orange) and half map 2 (blue) of the two independent half maps were calculated by PHENIX. The similarity between the orange and blue curves indicates that the refinement of the atomic coordinates did not suffer from over-fitting. **f,** Angular distribution of the particles used for final reconstruction of the CabRCS complex. **g,** Local resolution distrubition of the CabRCS complex calculated with RELION3.1.

**
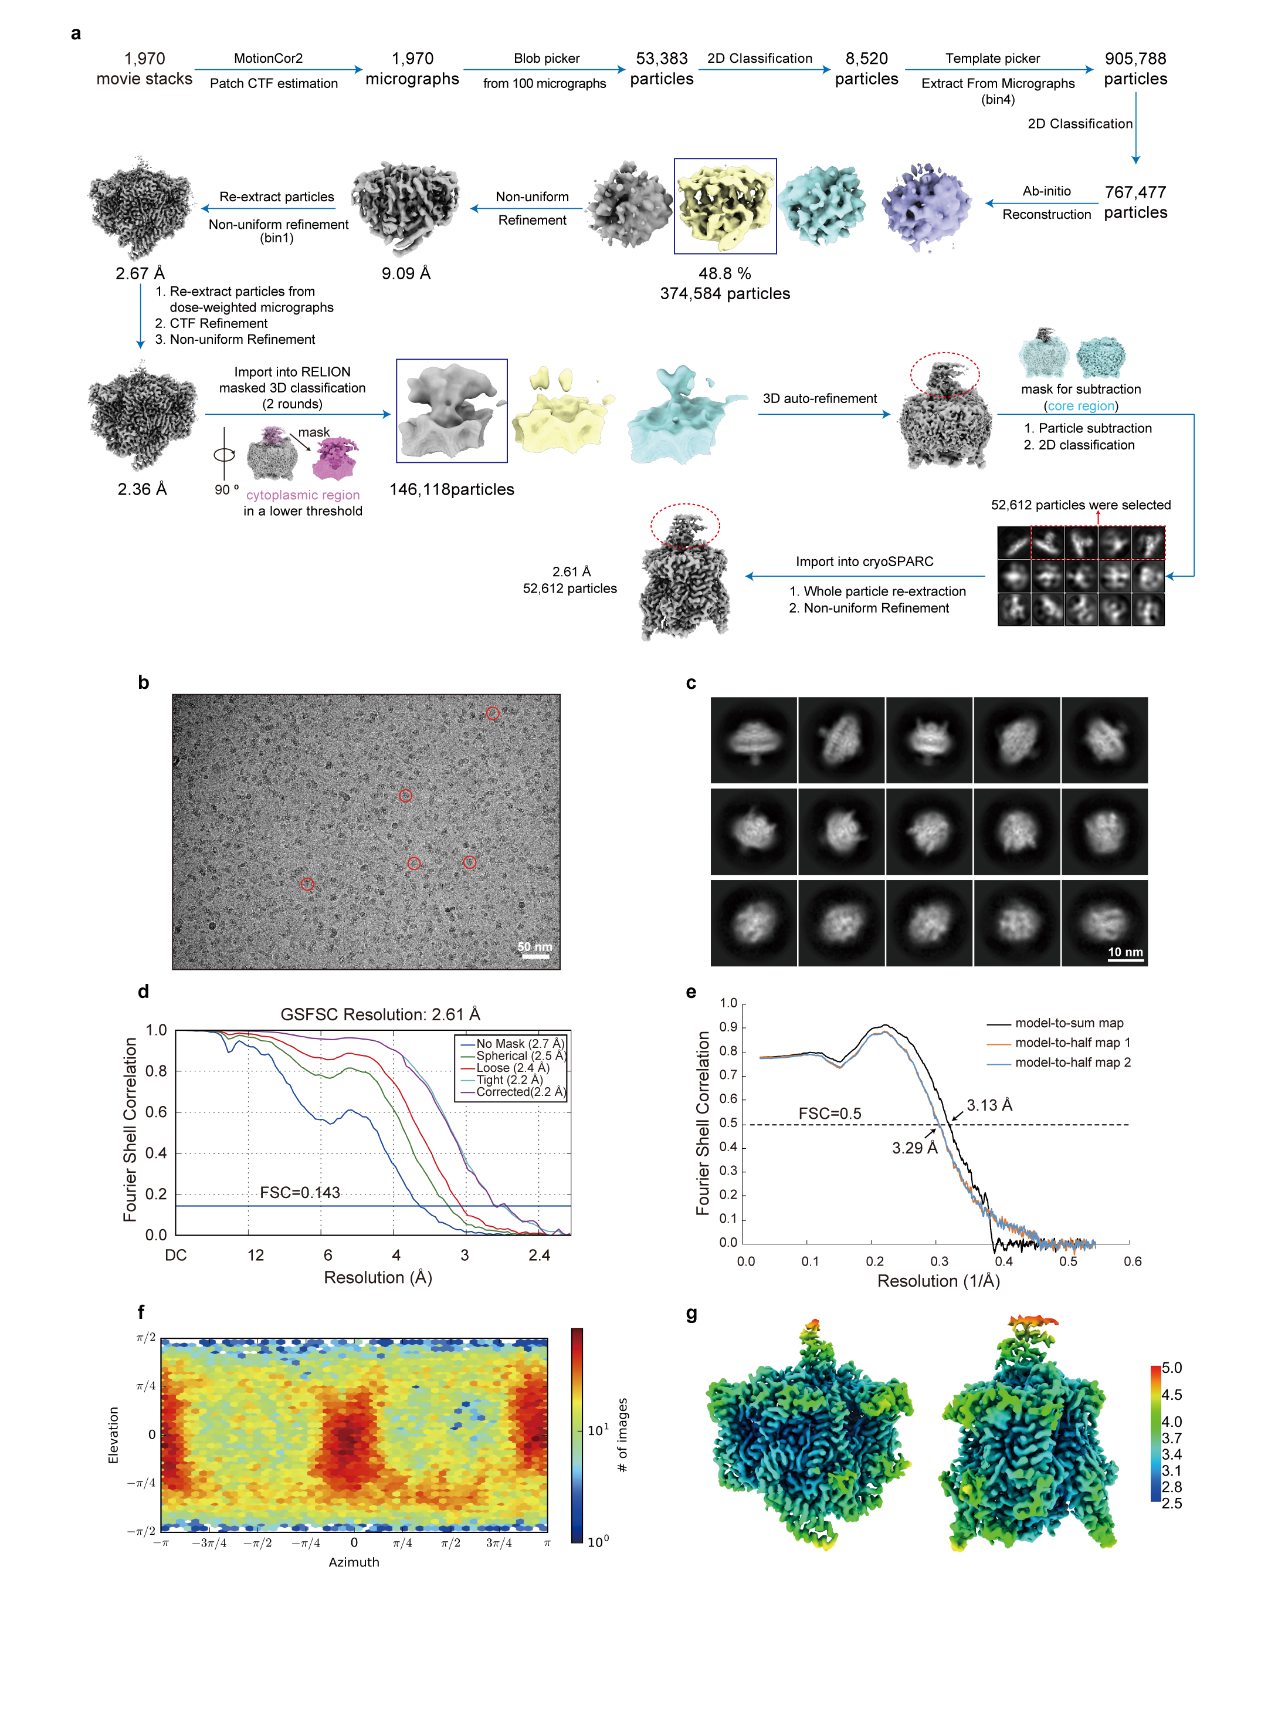
**

**Extended Data Fig.3 |** **Cryo-EM data processing and map quality of the CabRCL complex. a**, Flowchart of the cryo-EM data processing for the CabRCL complex. **b,** A representative cryo-EM micrograph of the CabRCL complex with typical particles marked by red cycles. **c,** Representative 2D-averaged classes of the CabRCL complex. **d,** Gold-standard Fourier shell correlation (FSC=0.143) curves of the CabRCL complex. The unmasked, spherical, loose, tight, corrected curves are shown with different colors. **e,** Model versus map FSC curves for the CabRCL complex. FSC curves of the final refined model for the CabRCL complex versus the sum map (black), half map1 (orange) and half map 2 (blue) of the two independent half maps were calculated by PHENIX. The similarity between the orange and blue curves indicates that the refinement of the atomic coordinates did not suffer from over-fitting. **f,** Angular distribution of the particles used for final reconstruction of the CabRCL complex. **g,** Local resolution maps for the CabRCL complex calculated with RELION3.0.

**
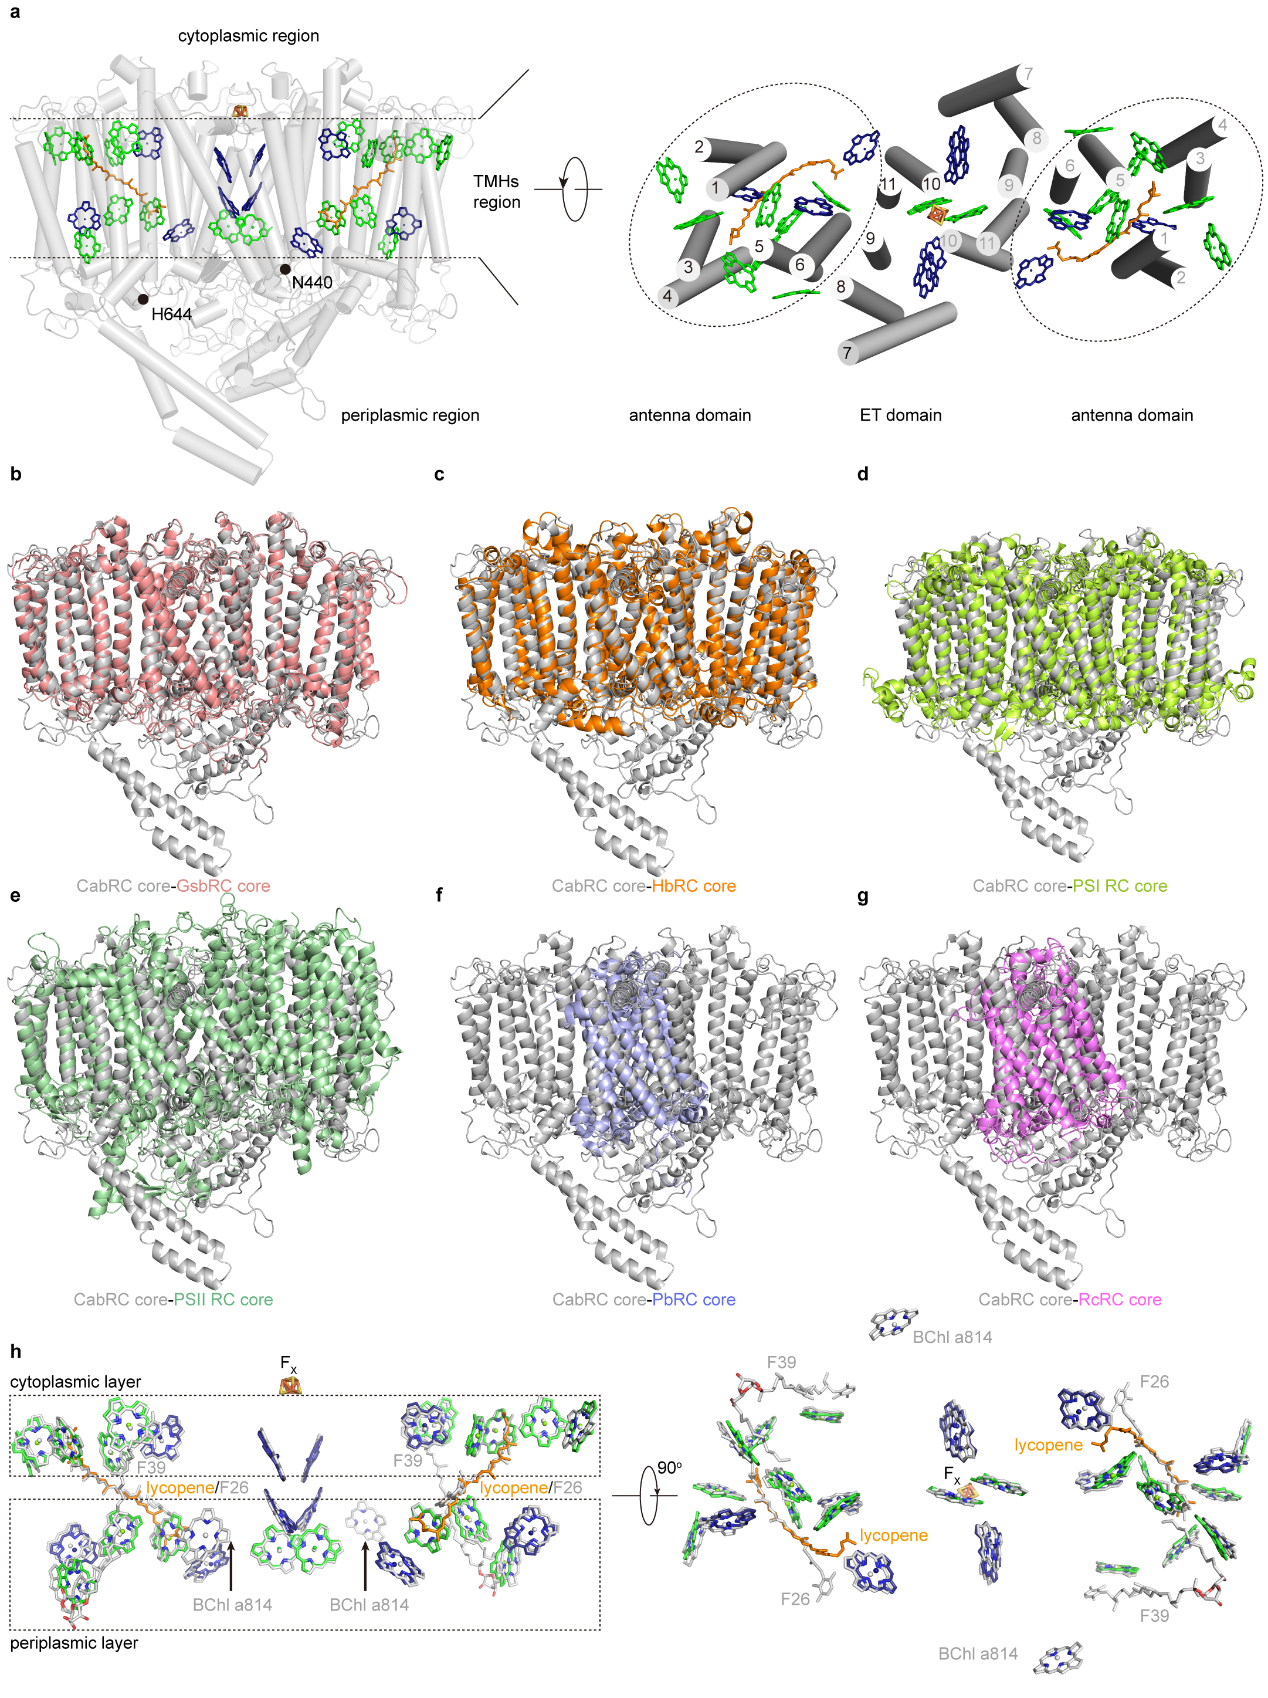
**

**Extended Data Fig. 4 | Comparison of the CabRC core with other representative type I and type II RC cores. a**,Structure of the CabRC core. The cytoplasmic region, periplasmic region and TMH region are indicated, and the TMH region are divided into two antenna domains and one ET domain. TMHs (1-11) are numbered from the N- to the C-terminals. **b** to **d**, Superposition of the CabRC core with other representative type I RC cores, i.e. GsbRC core (PscA homodimer, PDB code: 6M32) (**b**), HbRC core (PshA homodimer, PDB code: 5V8K) (**c**) and PSI RC core (PsaA and PsaB, PDB code: 1JB0) (**d**). **e** to **g**, Superposition of CabRC with representative type II RC cores, i.e. PSII RC core (D1, D2, CP43 and CP47, PDB code: 3WU2) (**e**), PbRC core (L subunit and M subunit, PDB code: 5Y5S) (**f**) and RcRC core (L subunit and M subunit, PDB code: 5YQ7) (**g**). **h**, Superposition of the distribution of (B)Chls *a* and carotenoids of CabRC and GsbRC.In CabRC, BChls *a* are colored in green, Chls *a* are colored in dark blue, and lycopenes are colored in brown. All pigments in GsbRC are colored in grey.

**
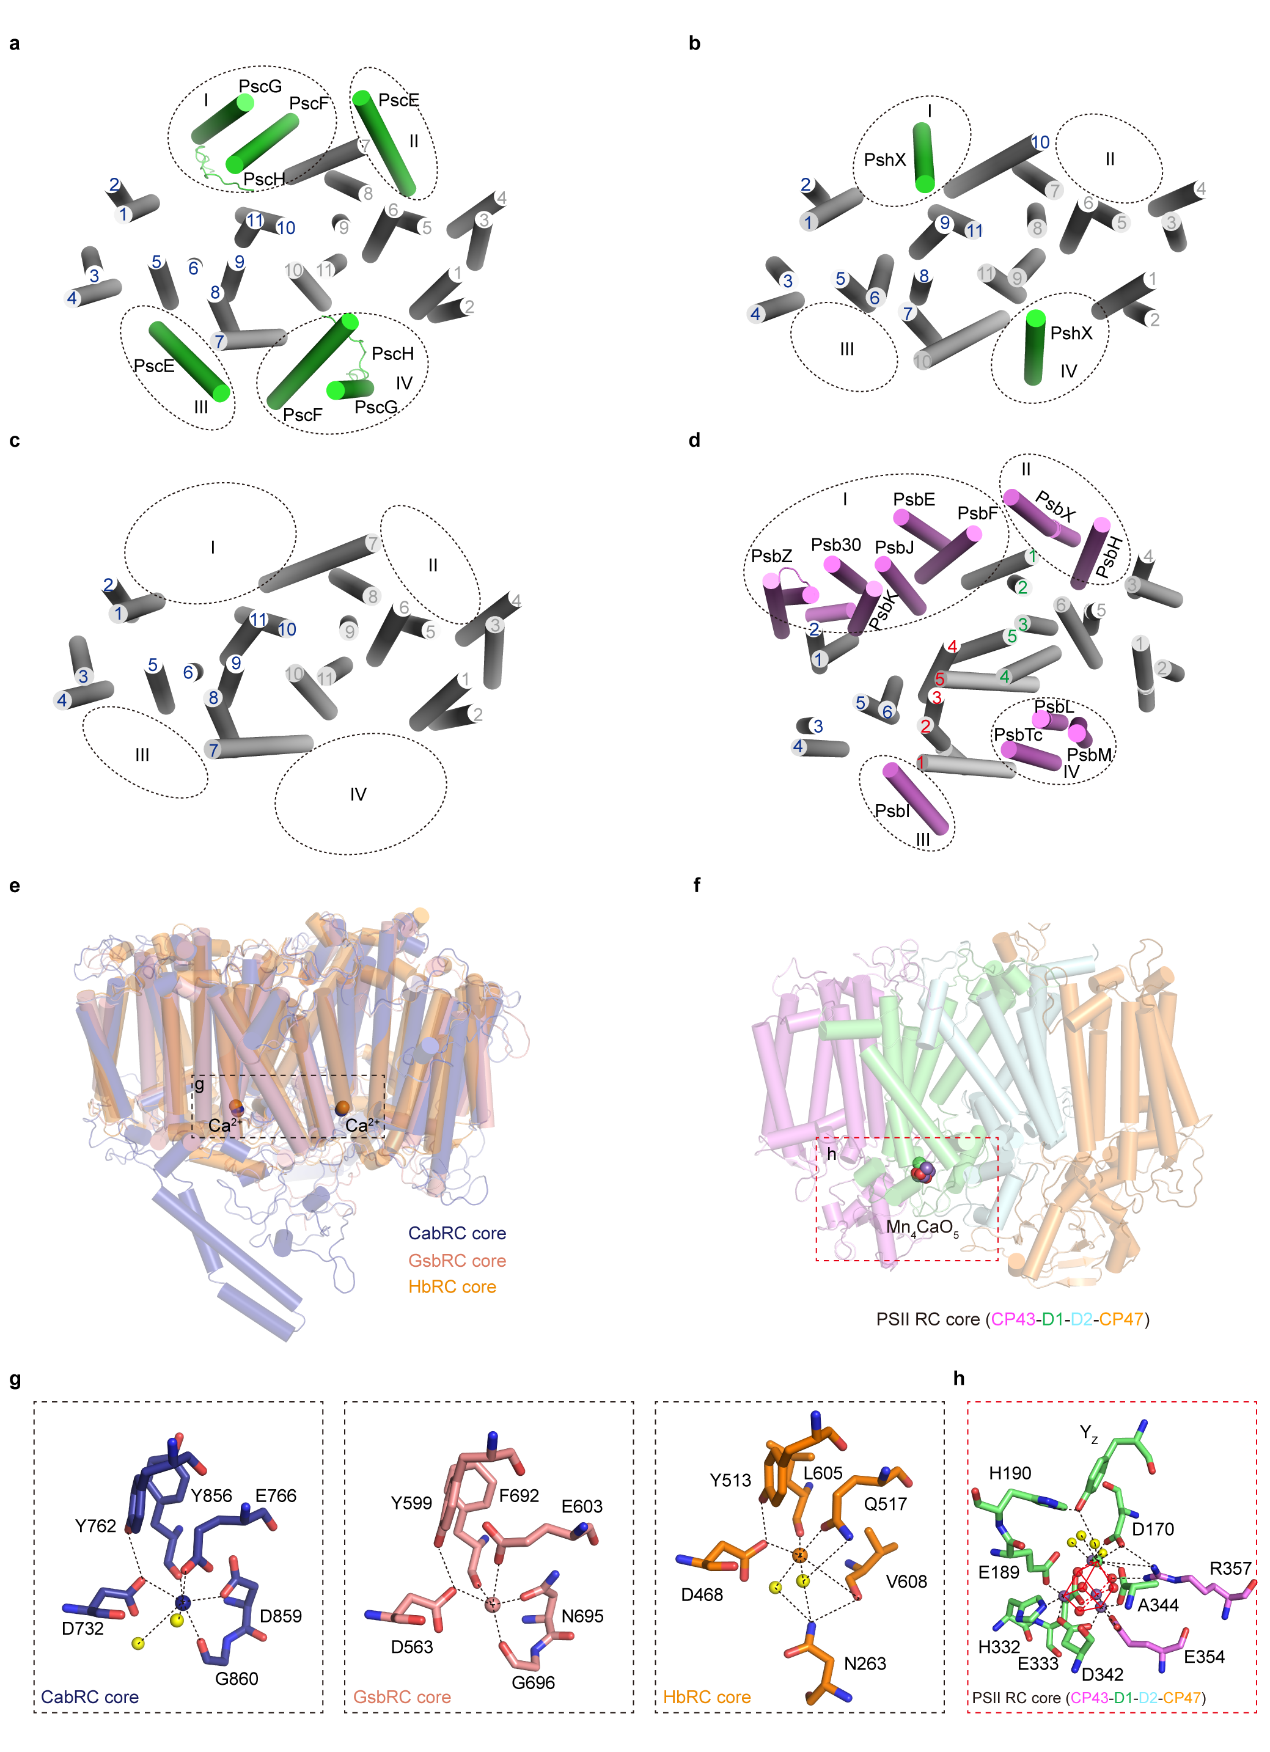
**

**Extended Data Fig. 5 | Comparison of the distribution of low molecular mass subunits and the Ca2+ or Mn4CaO5-binding environments in homodimeric type I RCs and PSII.** **a** to **c**, The distribution of low molecular mass subunits in CabRC (**a**), HbRC (**b**) and GsbRC (**c**), respectively. RC cores are shown with cartoon and colored in grey, and low molecular mass subunits are arranged in clusters I to IV. TMHs (number 1-11) of the largest subunits are depicted in blue and grey for each side. Low molecular mass subunits are colored in green. **d**, The distribution of low molecular mass subunits in PSII. Low molecular mass proteins are colored in magenta. TMHs of CP43 (number 1-6) and CP47 (number 1-6) are depicted in blue and grey, respectively, and TMHs of D1 (number 1-5) and D2 (number 1-5) are depicted in red and green, respectively. **e**,Superposition of the CabRC core with the GsbRC core (PscA homodimer, PDB code: 6M32) and HbRC core (PshA homodimer, PDB code: 5V8K) to show the positions of their Ca2+-binding sites. **f**, The position of Mn4CaO5 cluster in PSII RC core (CP43-D1-D2-CP47, PDB code: 3WU2). **g**,Close-up views of the Ca2+-binding environments in CabRC core, GsbRC core and HbRC core. Calcium ions in CabRC core, GsbRC core and HbRC core are colored in blue, salmon red and brown, respectively. **h**,Close-up views of the Mn4CaO5-binding environments in PSII. In panels **e**-**h**, Calcium ions, Mn4CaO5 and water molecules are shown in spheres, and the Ca2+ coordinating residues are shown in sticks; water molecules, Mn ions and oxygen atoms are colored in yellow, purple and red, respectively; interactions are indicated by black dotted lines.

**
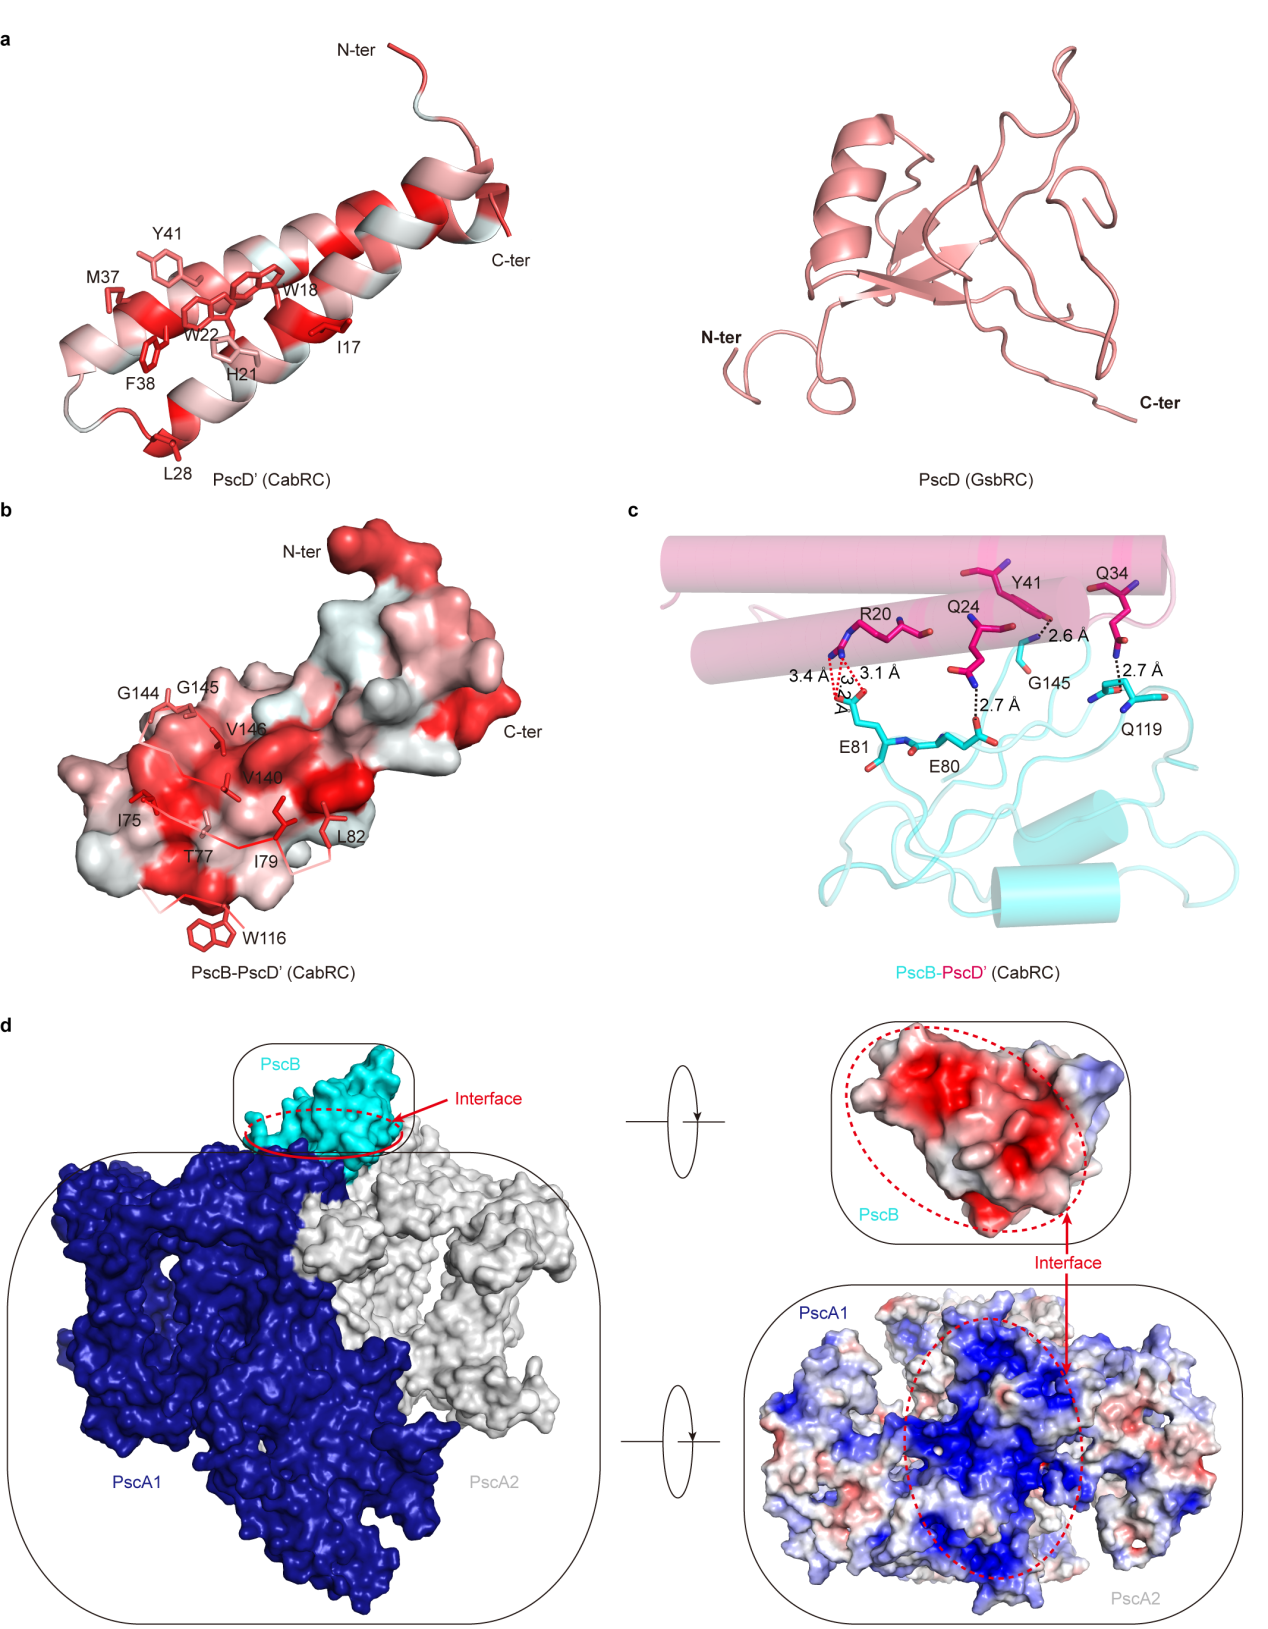
**

**Extended Data Fig. 6 | The interactions between PscB and PscD’ (a to c), and between PscB and the CabRC core (d). a**,Structures of PscD’ in CabRC and PscD in GsbRC (PDB code: 6M32). The main chain of PscD’ is shown in cartoon and its hydrophobic residues on the interface are shown in sticks. **b**, The hydrophobic interface between PscD’ and PscB. PscD’ is shown in surface, and the hydrophobic residues of PscB on the interface are shown in sticks. All residues of PscD’ in (**a**) and (**b**) are colored in red by their hydrophobicity. **c**, Hydrogen bonds (black dotted line) and salt bridges (red dotted line) formed at the interface between PscD’ and PscB. **d**, Interactions between PscB and the CabRC core,viewed by electrostatic potential (calculated with APBS tools) of the interface between them. The interface is indicated by red ellipses. Positive potential is shown in blue (+5 kT/e), and negative potential is in red (-5 kT/e).


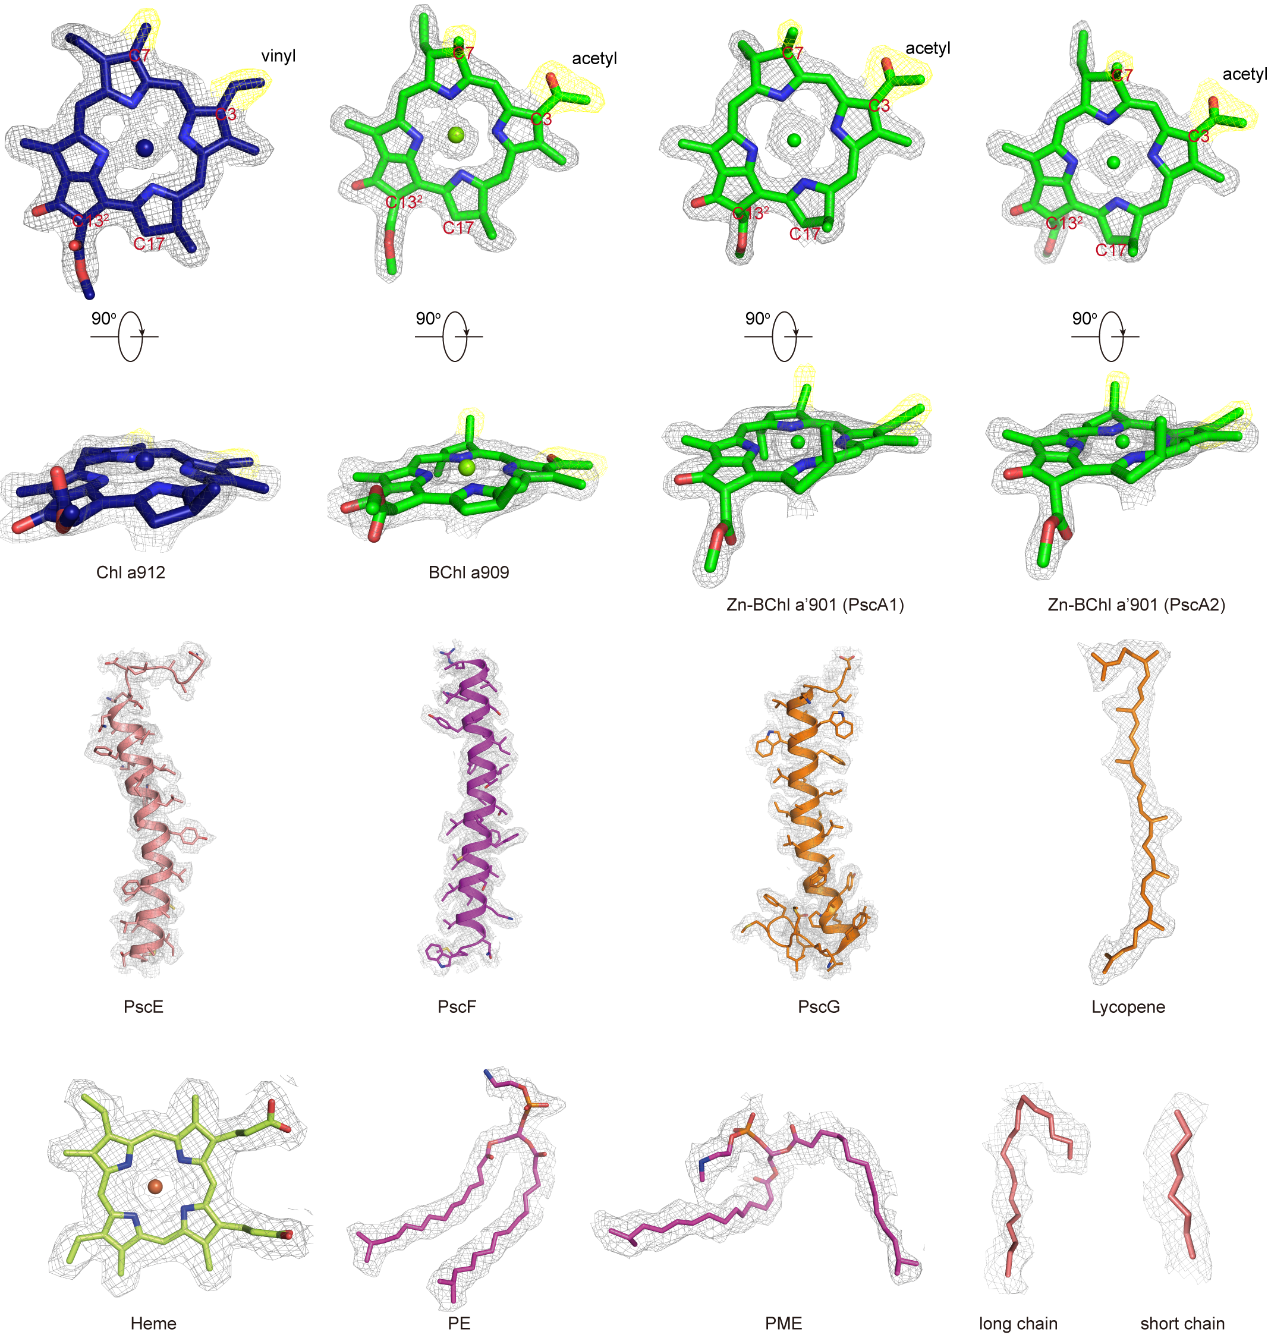


**Extended Data Fig. 7 | Representative cryo-EM maps of the PscE, PscF, PscG and the key cofactors.** PscE: cartoon, salmon red; PscF: carton, magenta; PscG: carton, brown; Lycopene: sticks, brown; Chl *a*: sticks, dark blue; BChl *a* and Zn-BChl *a*’: sticks, green; PE, DGTA and PME: sticks, magenta; Heme: sticks, lemon; long and short chain: sticks, salmon red; all densities are shown as grey meshes.

**
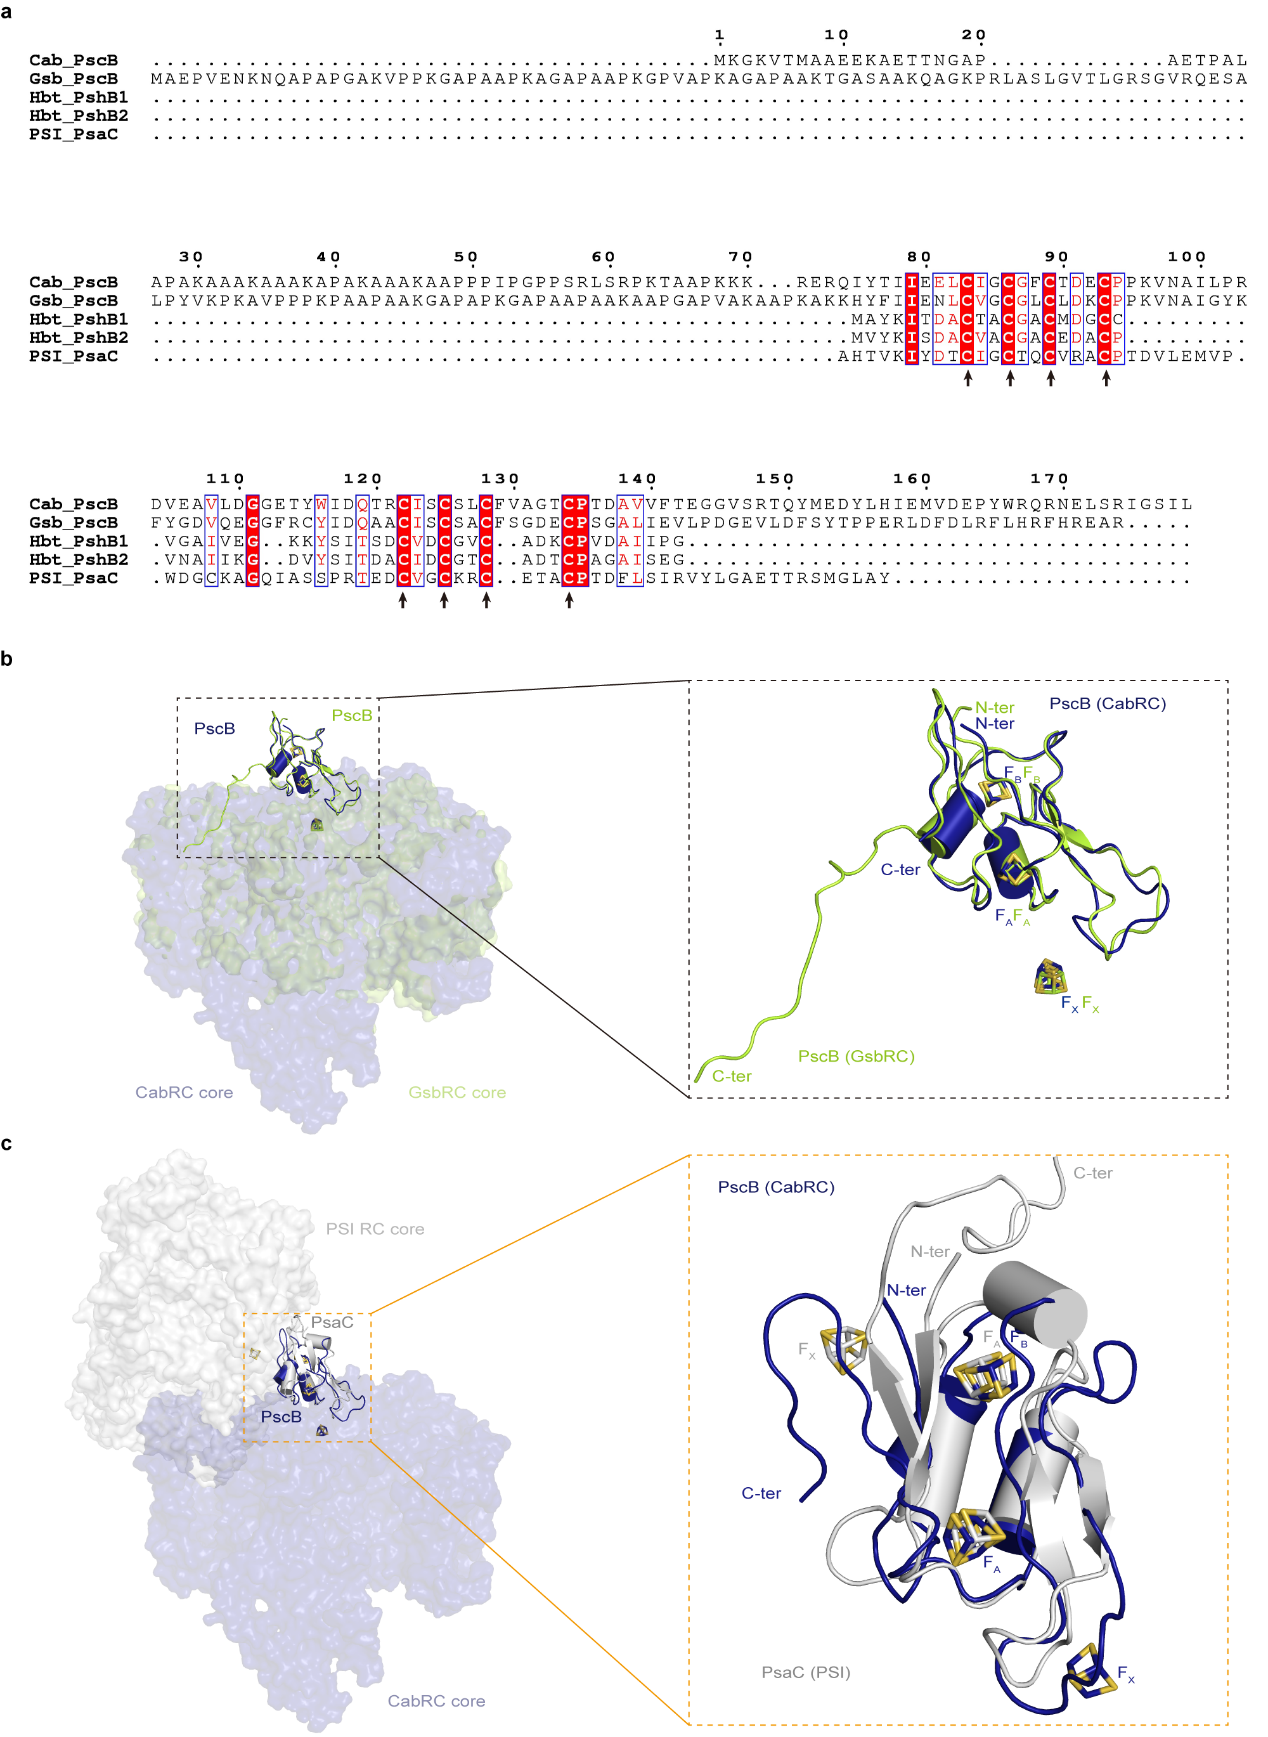
**

**Extended Data Fig. 8 | Comparison of the FA-FB arrangements in membrane-extrinsic electron acceptors. a**, Comparison of the primary sequences among five membrane-extrinsic electron acceptors. All conserved residues coordinated to Fe4S4 cluster are indicated with black arrows. This figure was generated by ESPrint 345. **b**,The arrangement of FX, FA and FB in CabRC and GsbRC, based on the superposition of their PscB subunits. **c**,The arrangement of FX, FA and FB in CabRC and PSI, based on the superposition of PscB/CabRC and PsaC/PSI. PDB codes: GsbRC, 6M32; PSI, 1JB0.

**Extended Data Table 1 | Cryo-EM data collection, refinement and validation statistics**

|  | #1 CabRCS  (EMDB-32229)  (PDB 7VZR) | #2 CabRCL  (EMDB-32228)  (PDB 7VZG) |
| --- | --- | --- |
| **Data collection and processing** |  |  |
| Magnification | 81,000 × | 81,000 × |
| Voltage (kV) | 300 | 300 |
| Electron exposure (e–/Å2) | 50 | 50 |
| Defocus range (μm) | -1.0 to -1.5 | -1.0 to -1.5 |
| Pixel size (Å) | 1.0825 | 1.0825 |
| Symmetry imposed | C1 | C1 |
| Initial particle images (no.) | 1,523,482 | 905,788 |
| Final particle images (no.) | 490,075 | 52,612 |
| Map resolution (Å)  FSC threshold | 2.22  0.143 | 2.61  0.143 |
| Map resolution range (Å) | 2.2 - 3.0 | 2.5 - 5.0 |
|  |  |  |
| **Refinement** |  |  |
| Initial model used (PDB code) | 6M32 | CabRCS |
| Model resolution (Å)  FSC threshold | 2.22  0.143 | 2.61  0.143 |
| Model resolution range (Å) | n/a | n/a |
| Map sharpening *B* factor (Å2) | -74.7 | -64.7 |
| Model composition  Non-hydrogen atoms  Protein residues  Ligands | 21,373  2,307  79 | 22,346  2,427  81 |
| *B* factors (Å2)  Protein  Ligand | 27.70  23.88 | 125.92  112.21 |
| R.m.s. deviations  Bond lengths (Å)  Bond angles (°) | 0.009  2.275 | 0.009  2.184 |
| Validation  MolProbity score  Clashscore  Poor rotamers (%) | 2.35  6.10  7.81 | 2.66  7.96  11.73 |
| Ramachandran plot  Favored (%)  Allowed (%)  Disallowed (%) | 95.13  4.69  0.18 | 93.70  6.13  0.17 |

**Extended Data Table 2 | Hydrogen bonds between PscC’ or PscC’’ with the CabRC core in the membrane-extrinsic region.**

| **NO.** | **Structure 1** | **Structure 2** | **Dis. (Å)** | **NO.** | **Structure 1** | **Structure 2** | **Dis. (Å)** |
| --- | --- | --- | --- | --- | --- | --- | --- |
|  | **PscA1** | **PscC’’** |  | 39 | ASN 744[ OD1] | ASN 179[N] | 2.84 |
| 1 | ASN 54[N] | GLY 23[O] | 2.76 | 40 | GLY 743[O] | ASN 179[ND2] | 3.08 |
| 2 | ASN 54[ND2] | SER 24[O] | 3.36 | 41 | ILE 753[O] | ASN 179[ND2] | 3.13 |
| 3 | LYS 346[ NZ ] | GLU 29[OE1] | 3.78 | 42 | ASN 744[OD1] | GLN 180[N] | 3.42 |
| 4 | LYS 346[NZ] | GLU 29[OE2] | 3.42 |  | **PscA2** | **PscC’** |  |
| 5 | ARG 865[NH2] | MET 37[O] | 3.74 | 1 | ASN 54[ND2] | VAL 23[O] | 3.00 |
| 6 | ARG 865[NH2] | PRO 38[O] | 3.17 | 2 | ASN 54[N] | GLY 24[O] | 2.86 |
| 7 | ARG 641[NH2] | LEU 39[O] | 3.89 | 3 | GLN 79[N] | GLY 4[O] | 3.43 |
| 8 | ARG 641[NE] | LEU 39[O] | 3.83 | 4 | LYS 346[NZ] | ASN 147[O] | 3.72 |
| 9 | ARG 641[NH2] | ASN 41[OD1] | 2.87 | 5 | LYS 346[NZ] | GLU 151[OE1] | 3.21 |
| 10 | THR 77[OG1] | THR 61[OG1] | 3.90 | 6 | THR 44[OG1] | GLY 20[N] | 3.30 |
| 11 | ARG 865[N] | VAL 82[O] | 2.98 | 7 | THR 51[O] | ARG 42[NH1] | 3.06 |
| 12 | ILE 753[N] | GLU 84[OE1] | 3.58 | 8 | MET 52[O] | ARG 26[N] | 2.95 |
| 13 | ASN 864[ND2] | GLU 84[OE2] | 3.20 | 9 | TRP 53[O] | ARG 42[NH1] | 3.24 |
| 14 | TRP 769[NE1] | ASN 124[OD1] | 3.42 | 10 | TRP 53[O] | ARG 42[NH2] | 3.18 |
| 15 | ARG 742[NE] | ASN 169[O] | 3.08 | 11 | ASP 55[OD1] | ARG 42[NH2] | 2.23 |
| 16 | ASN 744[ ND2] | ALA 176[O] | 3.15 | 12 | ASP 55[ OD2] | ARG 26[NH2] | 3.34 |
| 17 | ALA 746[N] | TYR 178[OH] | 3.75 | 13 | THR 77[O] | SER 36[N] | 3.10 |
| 18 | MET 52[O] | ARG 25[N] | 2.84 | 14 | ASP 337[O] | TYR 47[OH] | 2.96 |
| 19 | ASN 339[O] | ARG 25[NH1] | 3.03 | 15 | MET 338[O] | TYR 47[OH] | 3.41 |
| 20 | ILE 341[O] | ARG 25[ NH2] | 3.87 | 16 | ASN 339[O] | ARG 26[NH2] | 2.95 |
| 21 | ASN 339[O] | ARG 25[NH2] | 2.94 | 17 | ASN 339[O] | ARG 26[NH1] | 3.33 |
| 22 | ASP 55[OD2] | ARG 25[NH2] | 3.00 | 18 | ASN 339[OD1] | ARG 26[NH1] | 3.44 |
| 23 | ASP 55[OD1] | ARG 31[NE] | 3.21 | 19 | ASN 339[OD1] | GLN 144[NE2] | 3.49 |
| 24 | THR 51[O] | ARG 31[NH1] | 3.02 | 20 | GLU 627[OE2] | LYS 159[NZ] | 3.38 |
| 25 | TRP 53[O] | ARG 31[ NH2] | 2.77 |  | **PscA1** | **PscC’** |  |
| 26 | ASP 55[ OD1] | ARG 31[NH2] | 3.10 | 1 | GLU 505[OE1] | LEU 143[N] | 3.26 |
| 27 | ASP 337[O] | LYS 34[N] | 3.27 |  | **PscA2** | **PscC’’** |  |
| 28 | ASP 337[OD1] | LYS 34[NZ] | 3.68 | 1 | ASN 744[N] | GLY 135[O] | 3.11 |
| 29 | GLU 627[OE1] | SER 44[OG] | 2.71 | 2 | ASN 765[ND2] | ASN 136[OD1] | 3.15 |
| 30 | GLU 627[OE2] | THR 45[N] | 3.30 | 3 | TRP 769[ NE1] | PRO 138[O] | 2.94 |
| 31 | GLU 627[OE2] | LEU 46[N] | 3.69 | 4 | THR 768[OG1] | ALA 173[O] | 3.70 |
| 32 | LEU 749[O] | ASN 90[ND2] | 3.63 | 5 | GLN 453[N] | GLN 200[OE1] | 3.28 |
| 33 | ASN 752[OD1] | ASN 90[ND2] | 3.28 | 6 | ALA 451[N] | ASN 202[OD1] | 3.58 |
| 34 | LYS 346[O] | ASN 123[ND2] | 3.62 | 7 | GLY 508[O] | ARG 118[NH1] | 3.21 |
| 35 | TRP 771[O] | HIS 131[NE2] | 3.89 | 8 | GLY 508[O] | ARG 118[NH2] | 3.22 |
| 36 | SER 511[OG] | ASN 169[ND2] | 3.39 | 9 | ASN 744[O] | ASN 132[ND2] | 2.89 |
| 37 | GLU 45[OE2] | GLY 170[N] | 3.51 | 10 | ASN 765[OD1] | ASN 136[ND2] | 3.33 |
| 38 | ASN 744[OD1] | TYR 178[N] | 3.58 |  |  |  |  |
